# Supplementary material
Source: HighWire-hosted journal article supplement (https://bmjopen.bmj.com/content/12/6/e058473)
Supplement: inline-supplementary-material-2 [file inline-supplementary-material-2.pdf]

| Incl.nr                                                                                                                                                                                                                                                                                                                                          | Department/group | Bed                                                                                                                        | Observer (initials):                                                                                                                                                                                                                                       | Date:                                                                                                                                                 | Page /                                                                                                 |  |
|--------------------------------------------------------------------------------------------------------------------------------------------------------------------------------------------------------------------------------------------------------------------------------------------------------------------------------------------------|------------------|----------------------------------------------------------------------------------------------------------------------------|------------------------------------------------------------------------------------------------------------------------------------------------------------------------------------------------------------------------------------------------------------|-------------------------------------------------------------------------------------------------------------------------------------------------------|--------------------------------------------------------------------------------------------------------|--|
| <b>Relevant information electronic patient/medical record</b> (E.g. new medicine, changed dose/adm.form/dosage/ time, discontinued. Changed patient condition, etc.)                                                                                                                                                                             |                  |                                                                                                                            |                                                                                                                                                                                                                                                            |                                                                                                                                                       |                                                                                                        |  |
| <b>Start observation:</b>                                                                                                                                                                                                                                                                                                                        |                  | <b>End observation:</b>                                                                                                    |                                                                                                                                                                                                                                                            | <b>Tentative discharge date:</b>                                                                                                                      |                                                                                                        |  |
| <b>Encounter - type:</b><br><input type="checkbox"/> Measurements<br><input type="checkbox"/> Medicines adm.<br><input type="checkbox"/> Ward round<br><input type="checkbox"/> Meal                                                                                                                                                             |                  | <input type="checkbox"/> Medicines reconciliation<br><input type="checkbox"/> Discharge<br><input type="checkbox"/> Other: | <b>Hospital environment</b><br><input type="checkbox"/> Single-bed room<br><input type="checkbox"/> Meal <input type="checkbox"/> Facilitation,<br>e.g. movement, hygiene<br><input type="checkbox"/> Telephone/calling<br><input type="checkbox"/> Other: | <b>Written information about medicines at hospital discharge</b><br><input type="checkbox"/> Distributed<br><input type="checkbox"/> Reviewed jointly | <b>Health care personnel (oral and written consent)</b><br>Prof. title, incl.nr, ♂/♀<br>-----<br>----- |  |
| <p><b>Part 1:</b> Chronological observations; Actions, quotes patient/health care personnel (e.g. questions, use of medical terms), drawing of the setting.</p> <p><b>Part 2:</b> Observer interpretations, reactions, feelings, opinions (environment and communication). <i>Remember to describe any consequence of observer presence!</i></p> |                  |                                                                                                                            |                                                                                                                                                                                                                                                            |                                                                                                                                                       |                                                                                                        |  |

| Incl.nr                                                                                                                                                                                                                                                                                                                                                       | Department/group | Bed | Observer (initials): | Date: | Page / |
|---------------------------------------------------------------------------------------------------------------------------------------------------------------------------------------------------------------------------------------------------------------------------------------------------------------------------------------------------------------|------------------|-----|----------------------|-------|--------|
| <p><b>Part 1:</b> Chronological observations; Actions, quotes patient/health care personnel (e.g. questions, use of medical terms), drawing of the setting.</p> <p><b>Part 2:</b> Observer interpretations, reactions, feelings, opinions (environment and communication). <i>Remember to describe any consequence of observer presence!</i></p> <p>Cont.</p> |                  |     |                      |       |        |
