# Supplementary material
Source: HighWire-hosted journal article supplement (https://bmjopen.bmj.com/content/12/6/e058473)
Supplement: inline-supplementary-material-3 [file inline-supplementary-material-3.pdf]

## Interview guide

### Introduction

- Repetition of aim of study, voluntary participation and the opportunity to withdraw of consent. Audiotaping.
- Estimated time frame of the interview, breaks

### Experiences of the hospital stay, discharge and the period post-discharge

- How did you experience the information at the hospital?
  - Did you receive information continuously regarding treatment/medicines?
  - How was the communication between you and the healthcare professionals?
  - How involved were you in making decisions?
  - What was good/not good?
- How did you experience being observed?
- How did you experience the hospital discharge?
  - What kind of information did you get?
    - Did you review/read written information together with health professionals?
    - Were some information only provided as oral information?
  - In what extent did you find the information sufficient?
- How did you experience the information about medicines at the hospital?
  - What information did you get about new medicines
  - Who provided you with information
  - When did you start taking your new medications? Why not?
- Beliefs about medicines
  - What was the most important aspect related to the drug treatment at the hospital?
  - What are your thoughts about medicines in general? What does medicines mean to you? Positive/negative (e.g. side effects, addiction) experiences of medicines?
  - What effect(s) did you expect of the medicines, and what effect(s) have you experienced?
- How have you been after hospital discharge?
  - Did you feel ready for discharge?
  - What challenges did you experience, if any?
  - What is the plan further (e.g. medical treatment)?

### Medicines reconciliation conducted according to the IMM-model<sup>1</sup>

#### End of interview

- Something more to add?
- Opportunity to stay in touch, e.g. to add or request more information.
- Thank you so much for your time

1: Scullin C, Scott MG, Hogg A, McElroy JC. An innovative approach to integrated medicines management. *J Eval Clin Pract.* 2007;13(5):781-8.
